# Supplementary material for: Factors influencing cancer genetic somatic mutation test ordering by cancer physician
Source: PubMed Central journal article supplement (PMC7663861; doi:10.1186/s12967-020-02610-7), 2020-11-12
Supplement: 12967_2020_2610_MOESM1_ESM.pdf [file 12967_2020_2610_MOESM1_ESM.pdf]

## Supplemental Data

### Questionnaire

Please indicate the extent to which you agree or disagree with the following statements about the return of genomic sequencing information to patients:

|                                                                                                                                                                                                                                                                                                                       | Strongly disagree        | Somewhat disagree        | Neither agree nor disagree | Somewhat agree           | Strongly agree           |
|-----------------------------------------------------------------------------------------------------------------------------------------------------------------------------------------------------------------------------------------------------------------------------------------------------------------------|--------------------------|--------------------------|----------------------------|--------------------------|--------------------------|
| 1. Patients should <i>only</i> be offered their genomic sequence results if evidence demonstrates that actions based on the results can change patient management decisions and improve net health outcomes.                                                                                                          | <input type="checkbox"/> | <input type="checkbox"/> | <input type="checkbox"/>   | <input type="checkbox"/> | <input type="checkbox"/> |
| 2. Patients should be offered genomic sequence results for which there is an <i>established relationship between genotype and phenotype</i> (e.g., results can be used to diagnose a disorder or to assess risk for a disease), even if the results do not alter management decisions or improve net health outcomes. | <input type="checkbox"/> | <input type="checkbox"/> | <input type="checkbox"/>   | <input type="checkbox"/> | <input type="checkbox"/> |
| 3. Patients should be <i>offered as many of their genomic sequence results as they want</i> , up to and including their raw genomic sequence data.                                                                                                                                                                    | <input type="checkbox"/> | <input type="checkbox"/> | <input type="checkbox"/>   | <input type="checkbox"/> | <input type="checkbox"/> |

The questions that follow contain scenarios describing a particular type of genomic alteration derived from sequencing the patient's tumour DNA. **Assume:**

- the tumour DNA belongs to YOUR adult patient with a metastatic solid tumour
- the sequencing was performed in a NATA certified lab
- the patient is currently receiving a first-line standard chemotherapy regimen
- the patient is active and capable of self-care
- the patient has indicated that s/he would like to be told about all clinically valid genomic results



Please indicate how confident you are in your ability to do the following things.

|                                                                                                                                   | <b>Very confident</b>    | <b>Moderately confident</b> | <b>A little confident</b> | <b>Not confident at all</b> |
|-----------------------------------------------------------------------------------------------------------------------------------|--------------------------|-----------------------------|---------------------------|-----------------------------|
| 9. Ability to interpret somatic (tumour) genomic results in your disease area.                                                    | <input type="checkbox"/> | <input type="checkbox"/>    | <input type="checkbox"/>  | <input type="checkbox"/>    |
| 10. Ability to explain somatic genomic concepts to patients.                                                                      | <input type="checkbox"/> | <input type="checkbox"/>    | <input type="checkbox"/>  | <input type="checkbox"/>    |
| 11. Ability to make treatment recommendations based on somatic genomic information.                                               | <input type="checkbox"/> | <input type="checkbox"/>    | <input type="checkbox"/>  | <input type="checkbox"/>    |
| 12. Ability to identify consultants who have special expertise in integrating somatic genomic information into patients' care.    | <input type="checkbox"/> | <input type="checkbox"/>    | <input type="checkbox"/>  | <input type="checkbox"/>    |
| 13. Ability to provide psychosocial support related to coping with a somatic alteration that has adverse prognostic implications. | <input type="checkbox"/> | <input type="checkbox"/>    | <input type="checkbox"/>  | <input type="checkbox"/>    |

The next set of questions is about your use of genomics in practice.

*On average, how many times a year do you order or interpret the following types of genetic or genomic tests in your clinical practice?*

*Include both cases in which you order the test yourself and cases in which you use or interpret the results of tests ordered by others.*

|                                                                                                                                                   | Approximate Number of Times Per Year |
|---------------------------------------------------------------------------------------------------------------------------------------------------|--------------------------------------|
| 14. Somatic tests to evaluate for alterations in tumour DNA.                                                                                      | —                                    |
| 15. Germline tests to evaluate for inherited cancer predisposition syndromes.                                                                     | —                                    |
| 16. Germline tests to evaluate for pharmacogenetic polymorphisms (i.e., that affect drug metabolism or toxicity) related to <i>cancer drugs</i> . | —                                    |
| 17. Germline tests to evaluate for pharmacogenetic polymorphisms related to <i>non-cancer drugs</i> .                                             | —                                    |

18. To what extent does tumour pathology (e.g. histology, immunohistochemistry) inform treatment choices compared with the tumour molecular profile (e.g. EGFR/BRAF)?

Tumour Pathology  Tumour Molecular Profile

*(Please place a mark on the scale above)*

19. Which of the following would be beneficial when receiving a molecular profile report? (Tick all that apply)

- Genetics Staff (e.g. Clinical Geneticist/Genetic Counsellor) in clinic
- Genetics Staff on call
- Genetics Staff available by telephone
- Genetics Pathologist available by telephone
- Other \_\_\_\_\_

*The final set of questions is about you.*

20. How many years has it been since you graduated from medical school?

- 1-10 years
- 11-20 years
- 21-30 years
- 31-40 years
- >40 years

21. What is your specialty?

- Oncology (including Medical/Surgical/Radiation)
- Respiratory Physician
- Haematologist

Other \_\_\_\_\_

22. On average, how many unique patients do you see for treatment or evaluation each month? Please include both new and established patients. *Your best estimate is fine.*

\_\_\_\_\_ number

Do you have any additional thoughts that you wish to share about the issues raised in this survey? Please feel free to write in the space below as we welcome your feedback.

Other

**Thank you very much for completing this survey! Your participation is greatly appreciated.**

**Table S1.** Additional qualitative comments shared relating to the survey instrument

|                                                                                                                                                                                                                                                                                                                                 |
|---------------------------------------------------------------------------------------------------------------------------------------------------------------------------------------------------------------------------------------------------------------------------------------------------------------------------------|
| Of limited relevance to a general surgeon; it's dealt with by our oncologists                                                                                                                                                                                                                                                   |
| There is also a general lack of knowledge around costs - to the patient and to the system                                                                                                                                                                                                                                       |
| Some mutations have high reliability in assessment. Whole exome sequencing and many mutations lack testing for in the laboratory, reliability, and therefore their use in clinical practice should be considered unproven until reliability studies are undertaken.                                                             |
| I suspect in the near future - genomics probably will become part and parcel of management of patients with a new diagnosis of cancer                                                                                                                                                                                           |
| Major issue with sequencing is the lack of infrastructure to counsel the patients. Testing is the smallest component. Until this is in place, you will not see wide roll out.                                                                                                                                                   |
| As a respiratory physician, the main priorities have been - 1. consenting the patient for WES pre-biopsy 2. timely result notification                                                                                                                                                                                          |
| There is a need for increased and ongoing education of doctors in this aspect of medicine, which is a really exciting area which has already led to far-reaching improvements in cancer therapy.                                                                                                                                |
| These tests are being done without thought as to how to appropriately incorporate them into solid tumours. It is currently a wasted resource.                                                                                                                                                                                   |
| Emerging technology and application; ongoing education is very important.                                                                                                                                                                                                                                                       |
| Currently the way this service is run patients are not selected carefully enough for genomic testing. In the vast majority of cases, it is unhelpful and not a good use of resources. Also, there is no established, smooth way of getting the results to the clinicians who can interpret it. The system needs to be improved. |
| Much depends on who is funding testing - not appropriate for public fees to be spent on unproven technologies, but I don't have an issue with patients funding tests.                                                                                                                                                           |
| While not a genetics expert, it would greatly assist close consultation and genetic pathologist in our cancer diagnostics - either privately or publicly                                                                                                                                                                        |
| Be good to get review/input; we have a genetics counsellor working with us.                                                                                                                                                                                                                                                     |
| There is a lack of genetic counselling/advice available in my area of far North Queensland. Would like to see more of it. QH service overwhelmed by need.                                                                                                                                                                       |
| There is emerging data on the non-coding genome such as the promoter and effector regions which are making the science more complicated but also more fascinating in terms of gene experience/effect. So, I do not feel that at a clinic level we are ready to use most of the information practically.                         |
| I don't request many WGS studies i.e. foundation one etc.                                                                                                                                                                                                                                                                       |

All answers pertain to the diagnosed cancer related findings not incidental findings potentially related to other disorders

Approaching retirement so not representative of a busy oncology practice.

Need more clinical relevance to mutation; need more trial options

Heavily rely on medical oncology colleagues to order and interpret somatic genomic tests on our breast cancer patients.

Difficult keeping up with rapid development/change in this field

# TUMOR SPECIFIC REPORT

## Australian Translational Genomics Centre Queensland University of Technology

|              |             |               |            |
|--------------|-------------|---------------|------------|
| Patient Name | XXXXXXXXXX  | UR Number     | XXXXXXXXXX |
| DOB          | 14 Mar 2019 | AusLab Number | XXXXXXXXXX |
| Sex          | XXXXXXXXXX  | FIN           | XXXXXXXXXX |

## Whole Exome Somatic Test Report

|                      |             |                         |             |
|----------------------|-------------|-------------------------|-------------|
| Report Status:       | FINAL       | Report Type:            | Breast      |
| Sample Recieve Date: | 14 Mar 2019 | Report Generation Date: | 11 Feb 2019 |
| Specimen             | XXXXXXXXXX  | Tissue                  | XXXXXXXXXX  |
| QC Status:           | PASS        |                         |             |

Samples received all met initial input quality requirements, and have undergone whole exome sequencing and somatic mutations have been identified to assist with the genetic profiling of the tumour (see Methodology section for further details). No second, independent, sample was received. For further information, or questions, about this report, please contact ATGC directly using the contact details at the bottom of this page.

|                         |                   |
|-------------------------|-------------------|
| Tumour Burden:          | 5.2 Mutations/Mbp |
| Tumour Purity Estimate: | 16-36%            |

## Somatic Mutations Summary

There was 1 reportable variant found in this sample.

| Gene   | Mutation                | Consequence      | Variant Allele Frequency |
|--------|-------------------------|------------------|--------------------------|
| PIK3CA | NP_006209.2:p.Asn345Lys | missense_variant | 20.0%                    |

## Somatic CNV Summary

There were 3 reportable CNVs found in this sample.

| Gene | CNV Type | Copy Number | Start      | Stop       | Length  | Whole/Partial |
|------|----------|-------------|------------|------------|---------|---------------|
| FGF3 | GAIN     | 9           | 69,514,027 | 69,633,701 | 119,675 | Whole         |
| RSF1 | GAIN     | 5           | 77,402,202 | 77,475,734 | 73,533  | Partial       |
| RSF1 | GAIN     | 5           | 77,531,572 | 77,553,674 | 22,103  | Partial       |

## Somatic Mutations Details

### PIK3CA

**Gene** PIK3CA (missense\_variant, VAF = 20.0% Tumour AD = 401,100 Normal AD = 518,2)  
**HGVSG** NC\_000003.11:g.178921553T>A  
**HGVSc** NM\_006218.2:c.1035T>A  
**HGVSp** NP\_006209.2:p.Asn345Lys  
**COSMIC** COSM754 (count 108) FATHMM PATHOGENIC (0.955)

# Australian Translational Genomics Centre Queensland University of Technology

|                     |              |                      |              |
|---------------------|--------------|----------------------|--------------|
| <b>Patient Name</b> | XXXXXXXXXXXX | <b>UR Number</b>     | XXXXXXXXXXXX |
| <b>DOB</b>          | 14 Mar 2019  | <b>AusLab Number</b> | XXXXXXXXXXXX |
| <b>Sex</b>          | XXXXXXXXXXXX | <b>FIN</b>           | XXXXXXXXXXXX |

This mutation is associated with 1 clinical variant

**Variant** MUTATION, [311](#), Transcript Variant, Gain Of Function Variant

**Description** PIK3CA mutations are observed in many cancers among the most prevalent are breast cancer, colorectal cancer, and head and neck squamous cell carcinoma. These mutations have been observed in up to 40%, 20%, and 21% respectively for each of these cancer types with mutations commonly occurring within the helical exon 9 and kinase domain of exon 20. In breast cancer PIK3CA mutations have been associated with better prognosis, and a greater survival outcome, however the PI3K pathway is also associated with increased drug resistance (trastuzumab /lapatinib). PIK3CA mutations in both HNSCC and CRC have been associated with resistance to anti-EGFR therapeutic agents and mutations in exon 9 and 20 are associated with a poorer prognosis in CRC. Interestingly PIK3CA mutations in HNSCC have been observed to be absent from a number of ethnic groups including greek, german, and vietnamese populations.

This variant has 3 evidence items associated with it

| Level | ID   | Disease                              | Type       | Direction | Significance         | PubMed ID                |
|-------|------|--------------------------------------|------------|-----------|----------------------|--------------------------|
| B     | 1296 | Her2-receptor Positive Breast Cancer | Predictive | Supports  | Sensitivity/Response | <a href="#">27091708</a> |
| B     | 1384 | Her2-receptor Positive Breast Cancer | Predictive | Supports  | Resistance           | <a href="#">17936563</a> |
| B     | 6188 | Breast Cancer                        | Prognostic | Supports  | Better Outcome       | <a href="#">17575221</a> |

## Somatic CNV Details

### FGF3 - GAIN - Copy number 9

**Variant** AMPLIFICATION, [630](#), Transcript Amplification

**Description**

This variant has 1 evidence item associated with it

| Level | ID   | Disease       | Type       | Direction | Significance         | PubMed ID                |
|-------|------|---------------|------------|-----------|----------------------|--------------------------|
| B     | 1606 | Breast Cancer | Predictive | Supports  | Sensitivity/Response | <a href="#">23658459</a> |

### RSF1 - GAIN - Copy number 5

**Variant** AMPLIFICATION, [358](#), Transcript Amplification

**Description**

This variant has 1 evidence item associated with it

| Level | ID  | Disease       | Type       | Direction | Significance | PubMed ID                |
|-------|-----|---------------|------------|-----------|--------------|--------------------------|
| B     | 857 | Breast Cancer | Predictive | Supports  | Resistance   | <a href="#">24367492</a> |

### RSF1 - GAIN - Copy number 5

# Australian Translational Genomics Centre Queensland University of Technology

|                     |             |                      |            |
|---------------------|-------------|----------------------|------------|
| <b>Patient Name</b> | XXXXXXXXXX  | <b>UR Number</b>     | XXXXXXXXXX |
| <b>DOB</b>          | 14 Mar 2019 | <b>AusLab Number</b> | XXXXXXXXXX |
| <b>Sex</b>          | XXXXXXXXXX  | <b>FIN</b>           | XXXXXXXXXX |

**Variant** AMPLIFICATION, [358](#), Transcript Amplification

## Description

This variant has 1 evidence item associated with it

| Level | ID  | Disease       | Type       | Direction | Significance | PubMed ID                |
|-------|-----|---------------|------------|-----------|--------------|--------------------------|
| B     | 857 | Breast Cancer | Predictive | Supports  | Resistance   | <a href="#">24367492</a> |

## Additional Comments

There are no additional comments for this report

## Methodology

DNA libraries were prepared from the received samples and target regions captured using the IDT exome capture kit plus IDT custom spike in. Massively parallel sequencing was performed using the Illumina NextSeq 500 platform to an average depth of 507X for this sample. Data were aligned to the GRCh37 Human Genome reference sequence using the ATGC Bioinformatics Pipeline version and annotated according to the ATGC Clinical Variant Database version.

The assay reports somatic single nucleotide variants (SNV) and small (<100bp) insertions and deletions (INDELs) with a variant allele frequency >3% and the frequency is greater than the percentage of contamination detected plus 1.5%. Copy number variants (CNVs) spanning partial or whole genes are reported when amplification exceeds 5 copies or more and deletions are reported when the tumour purity (proportion of the sample that contains the somatic variant) is estimated to be greater than 60%. Previous validation assays found that the sensitivity of >99.5% for SNVs, >95% for INDELs with VAF >5% and sensitivity to reportable CNVs is >75% for tumour purities >15%. For higher tumour purities where VAF >25%, the sensitivity rises to >99.5% for SNVs and >95% for INDELs. For reportable CNVs sensitivity is >85% when tumour purity is >75% and >60% when tumour purity is >60%. The total mutational burden is a count of SNVs and INDELs within the IDT custom spike in regions predicted to cause protein coding alterations divided by the total number of bases tested (in Mbp).

The following genes were selected for filtering based on documented association with this cancer/tissue type:

ERBB2, FGF3, FGFR1, FGFR2, NCOA3, PIK3CA, PTEN, RSF1, TP53

These genes appear in the ATGC Clinical Variant database and either the genes and/or the specific variants are associated with A or B level evidence.

**Level A** Validated association: Proven/consensus association in human medicine.

**Level B** Clinical evidence: Clinical trial or other primary patient data supports association.

In some instances, all somatic protein coding variants within a specific gene are deemed reportable. In order to ascertain whether a variant affects protein coding the Variant Effect Predictor categorises the variants using RefSeq transcripts and results are reported using HGVS nomenclature (<https://varnomen.hgvs.org>).

Rare errors in annotation can arise due to the presence of genomic transcripts not described in RefSeq. Alternatively, multiple genomic variations may combine to produce undetected protein coding changes. This could generate false positive and false negative results. The assay is not designed to ascertain whether the identified variants alter expression in the tissue sample.

# Australian Translational Genomics Centre Queensland University of Technology

|                     |             |                      |            |
|---------------------|-------------|----------------------|------------|
| <b>Patient Name</b> | XXXXXXXXXX  | <b>UR Number</b>     | XXXXXXXXXX |
| <b>DOB</b>          | 14 Mar 2019 | <b>AusLab Number</b> | XXXXXXXXXX |
| <b>Sex</b>          | XXXXXXXXXX  | <b>FIN</b>           | XXXXXXXXXX |

For **research use only** information about mutations outside of the genes listed above, please contact ATGC directly via the contact details at the bottom of this page.

|                             |                                 |                                 |                                          |
|-----------------------------|---------------------------------|---------------------------------|------------------------------------------|
| <b>Tumour ID:</b>           | 20170724-0003                   | <b>Workflow Version:</b>        | 3.2.0                                    |
| <b>Normal ID:</b>           | 20170724-0001                   | <b>Workflow Commit:</b>         | e42932266e4a8d4beb3df16c6877b07a7e311b5b |
| <b>Clinical DB Version:</b> | 2018-11-27.2                    | <b>Report Software Version:</b> | 1.4.0                                    |
| <b>VEP Version:</b>         | v91                             | <b>Report Software Commit:</b>  | 444d1a491c89898ac4e6dad28e908861e7e0828a |
| <b>Run ID:</b>              | 171005_NB501489_0080_AHL2Y5BGX2 | <b>Analysis ID:</b>             | f408369d-d93d-4c49-93a1-eb304d9bd62a     |

## Disclaimer

The methods used to produce this report have been validated by Australian Translational Genomics Centre (ATGC) at Queensland University of Technology. Nonetheless, there is a chance that false positive and false negative results may occur as Pathology Queensland and ATGC are not in control of the tissue collection. Tissue collection factors that may give rise to false positive or false negative results include tissue heterogeneity, insufficient tissue quality, or contamination. A list of methodology including the bioinformatics pipeline utilised to draft the report are noted above. Diseases are influenced by many factors, including epigenetic and environmental variables that may not be addressed by this report, and, as such, the report should not be interpreted in isolation. Any diagnosis, or prognosis, should consider all pertinent clinical information in addition to this report. The bioinformatics pipeline used to identify the variants reported has also been validated by ATGC. The analysis limitations are outlined in the methodology section of this report.

The clinical significance of many variants is not well understood and interpretation of variants may change over time. Interpretation of variants in this report is performed to the best knowledge of the laboratory based on the information available at the time of reporting. Re-analysis of variants in previously issued reports in light of new evidence is not routinely performed, but may be available upon request

# PAN-CANCER REPORT

## Australian Translational Genomics Centre Queensland University of Technology

|              |             |               |            |
|--------------|-------------|---------------|------------|
| Patient Name | XXXXXXXXXX  | UR Number     | XXXXXXXXXX |
| DOB          | 14 Mar 2019 | AusLab Number | XXXXXXXXXX |
| Sex          | XXXXXXXXXX  | FIN           | XXXXXXXXXX |

## Whole Exome Somatic Test Report

THIS REPORT IS FOR RESEARCH USE ONLY

|                      |             |                         |             |
|----------------------|-------------|-------------------------|-------------|
| Report Status:       | FINAL       | Report Type:            | Pan         |
| Sample Recieve Date: | 14 Mar 2019 | Report Generation Date: | 11 Feb 2019 |
| Specimen             | XXXXXXXXXX  | Tissue                  | XXXXXXXXXX  |
| QC Status:           | PASS        |                         |             |

Samples received all met initial input quality requirements, and have undergone whole exome sequencing and somatic mutations have been identified to assist with the genetic profiling of the tumour (see Methodology section for further details). No second, independent, sample was received. For further information, or questions, about this report, please contact ATGC directly using the contact details at the bottom of this page.

|                         |                   |
|-------------------------|-------------------|
| Tumour Burden:          | 5.2 Mutations/Mbp |
| Tumour Purity Estimate: | 16-36%            |

## Somatic Mutations Summary

There were 2 reportable variants found in this sample.

| Gene   | Mutation                   | Consequence      | Variant Allele Frequency |
|--------|----------------------------|------------------|--------------------------|
| PIK3CA | NP_006209.2:p.Asn345Lys    | missense_variant | 20.0%                    |
| FANCC  | NP_001230672.1:p.Ala547Val | missense_variant | 17.9%                    |

## Somatic CNV Summary

There were 10 reportable CNVs found in this sample.

| Gene  | CNV Type | Copy Number | Start      | Stop       | Length  | Whole/Partial |
|-------|----------|-------------|------------|------------|---------|---------------|
| MSH2  | LOSS     | 0           | 47,596,643 | 47,748,169 | 151,527 | Whole         |
| MSH6  | LOSS     | 0           | 47,797,458 | 48,011,377 | 213,920 | Partial       |
| MSH6  | LOSS     | 0           | 48,023,031 | 48,066,813 | 43,783  | Partial       |
| FANCC | LOSS     | 0           | 97,887,366 | 98,011,573 | 124,208 | Partial       |
| CCND1 | GAIN     | 5           | 69,456,080 | 69,490,007 | 33,928  | Whole         |
| FGF3  | GAIN     | 9           | 69,514,027 | 69,633,701 | 119,675 | Whole         |
| RSF1  | GAIN     | 5           | 77,402,202 | 77,475,734 | 73,533  | Partial       |
| RSF1  | GAIN     | 5           | 77,531,572 | 77,553,674 | 22,103  | Partial       |
| NF2   | LOSS     | 0           | 29,438,481 | 30,138,469 | 699,989 | Whole         |

# Australian Translational Genomics Centre Queensland University of Technology

|                     |             |                      |            |
|---------------------|-------------|----------------------|------------|
| <b>Patient Name</b> | XXXXXXXXXX  | <b>UR Number</b>     | XXXXXXXXXX |
| <b>DOB</b>          | 14 Mar 2019 | <b>AusLab Number</b> | XXXXXXXXXX |
| <b>Sex</b>          | XXXXXXXXXX  | <b>FIN</b>           | XXXXXXXXXX |

|       |      |   |            |            |        |       |
|-------|------|---|------------|------------|--------|-------|
| SOX10 | LOSS | 0 | 38,307,957 | 38,379,808 | 71,852 | Whole |
|-------|------|---|------------|------------|--------|-------|

## Somatic Mutations Details

### PIK3CA

**Gene** PIK3CA (missense\_variant, VAF = 20.0% Tumour AD = 401,100 Normal AD = 518,2)

**HGVSc** NC\_000003.11:g.178921553T>A

**HGVSc** NM\_006218.2:c.1035T>A

**HGVSp** NP\_006209.2:p.Asn345Lys

**COSMIC** COSM754 (count 108) FATHMM PATHOGENIC (0.955)

This mutation is associated with 1 clinical variant

**Variant** MUTATION, [311](#), Transcript Variant, Gain Of Function Variant

**Description** PIK3CA mutations are observed in many cancers among the most prevalent are breast cancer, colorectal cancer, and head and neck squamous cell carcinoma. These mutations have been observed in up to 40%, 20%, and 21% respectively for each of these cancer types with mutations commonly occurring within the helical exon 9 and kinase domain of exon 20. In breast cancer PIK3CA mutations have been associated with better prognosis, and a greater survival outcome, however the PI3K pathway is also associated with increased drug resistance (trastuzumab /lapatinib). PIK3CA mutations in both HNSCC and CRC have been associated with resistance to anti-EGFR therapeutic agents and mutations in exon 9 and 20 are associated with a poorer prognosis in CRC. Interestingly PIK3CA mutations in HNSCC have been observed to be absent from a number of ethnic groups including greek, german, and vietnamese populations.

This variant has 20 evidence items associated with it

# Australian Translational Genomics Centre Queensland University of Technology

|                     |             |                      |            |
|---------------------|-------------|----------------------|------------|
| <b>Patient Name</b> | XXXXXXXXXX  | <b>UR Number</b>     | XXXXXXXXXX |
| <b>DOB</b>          | 14 Mar 2019 | <b>AusLab Number</b> | XXXXXXXXXX |
| <b>Sex</b>          | XXXXXXXXXX  | <b>FIN</b>           | XXXXXXXXXX |

| Level | ID   | Disease                               | Type       | Direction | Significance         | PubMed ID                |
|-------|------|---------------------------------------|------------|-----------|----------------------|--------------------------|
| B     | 915  | Colorectal Cancer                     | Predictive | Supports  | Resistance           | <a href="#">23435830</a> |
| B     | 1296 | Her2-receptor Positive Breast Cancer  | Predictive | Supports  | Sensitivity/Response | <a href="#">27091708</a> |
| B     | 1384 | Her2-receptor Positive Breast Cancer  | Predictive | Supports  | Resistance           | <a href="#">17936563</a> |
| B     | 3040 | Cancer                                | Predictive | Supports  | Sensitivity/Response | <a href="#">28489509</a> |
| B     | 6188 | Breast Cancer                         | Prognostic | Supports  | Better Outcome       | <a href="#">17575221</a> |
| B     | 6301 | Colorectal Cancer                     | Predictive | Supports  | Resistance           | <a href="#">19603024</a> |
| B     | 6362 | Colorectal Cancer                     | Predictive | Supports  | Resistance           | <a href="#">19223544</a> |
| B     | 6375 | Colorectal Cancer                     | Predictive | Supports  | Sensitivity/Response | <a href="#">23094721</a> |
| D     | 771  | Colorectal Cancer                     | Predictive | Supports  | Sensitivity/Response | <a href="#">25242168</a> |
| D     | 1360 | Head And Neck Cancer                  | Predictive | Supports  | Sensitivity/Response | <a href="#">23619167</a> |
| D     | 1402 | Cancer                                | Predictive | Supports  | Sensitivity/Response | <a href="#">24608574</a> |
| D     | 1490 | Head And Neck Squamous Cell Carcinoma | Predictive | Supports  | Sensitivity/Response | <a href="#">26589432</a> |
| D     | 1501 | Stomach Cancer                        | Predictive | Supports  | Sensitivity/Response | <a href="#">24088382</a> |
| D     | 1503 | Cancer                                | Predictive | Supports  | Sensitivity/Response | <a href="#">22294718</a> |
| D     | 1504 | Her2-receptor Positive Breast Cancer  | Predictive | Supports  | Sensitivity/Response | <a href="#">22294718</a> |
| D     | 1600 | Breast Cancer                         | Predictive | Supports  | Sensitivity/Response | <a href="#">25002028</a> |
| D     | 1607 | Breast Cancer                         | Predictive | Supports  | Sensitivity/Response | <a href="#">25002028</a> |
| D     | 1610 | Breast Cancer                         | Predictive | Supports  | Sensitivity/Response | <a href="#">21358673</a> |
| D     | 1616 | Endometrial Cancer                    | Predictive | Supports  | Sensitivity/Response | <a href="#">23674493</a> |
| D     | 1705 | Colorectal Cancer                     | Predictive | Supports  | Resistance           | <a href="#">22586653</a> |

## FANCC

**Gene** FANCC (missense\_variant, VAF = 17.9% Tumour AD = 102,22 Normal AD = 140,1)

**HGVSc** NC\_000009.11:g.97864026G>A

**HGVSp** NM\_001243743.1:c.1640C>T

**HGVSp** NP\_001230672.1:p.Ala547Val

**COSMIC** This mutation does not appear in COSMIC

This mutation is associated with 1 clinical variant

**Variants** LOSS-OF-FUNCTION, [534](#) , Loss Of Function Variant

### Description

This variant has 1 evidence item associated with it

| Level | ID   | Disease           | Type       | Direction | Significance         | PubMed ID                |
|-------|------|-------------------|------------|-----------|----------------------|--------------------------|
| D     | 1307 | Pancreatic Cancer | Predictive | Supports  | Sensitivity/Response | <a href="#">16243825</a> |

# Australian Translational Genomics Centre Queensland University of Technology

|                     |             |                      |            |
|---------------------|-------------|----------------------|------------|
| <b>Patient Name</b> | XXXXXXXXXX  | <b>UR Number</b>     | XXXXXXXXXX |
| <b>DOB</b>          | 14 Mar 2019 | <b>AusLab Number</b> | XXXXXXXXXX |
| <b>Sex</b>          | XXXXXXXXXX  | <b>FIN</b>           | XXXXXXXXXX |

## Somatic CNV Details

### MSH2 - LOSS - Copy number 0

**Variant** LOSS, [808](#), Loss Of Function Variant

#### Description

This variant has 1 evidence item associated with it

| Level | ID   | Disease              | Type       | Direction | Significance         | PubMed ID                |
|-------|------|----------------------|------------|-----------|----------------------|--------------------------|
| C     | 1877 | Urothelial Carcinoma | Predictive | Supports  | Sensitivity/Response | <a href="#">26674132</a> |

### MSH6 - LOSS - Copy number 0

**Variant** LOSS, [809](#), Loss Of Function Variant

#### Description

This variant has 1 evidence item associated with it

| Level | ID   | Disease              | Type       | Direction | Significance         | PubMed ID                |
|-------|------|----------------------|------------|-----------|----------------------|--------------------------|
| C     | 1878 | Urothelial Carcinoma | Predictive | Supports  | Sensitivity/Response | <a href="#">26674132</a> |

### MSH6 - LOSS - Copy number 0

**Variant** LOSS, [809](#), Loss Of Function Variant

#### Description

This variant has 1 evidence item associated with it

| Level | ID   | Disease              | Type       | Direction | Significance         | PubMed ID                |
|-------|------|----------------------|------------|-----------|----------------------|--------------------------|
| C     | 1878 | Urothelial Carcinoma | Predictive | Supports  | Sensitivity/Response | <a href="#">26674132</a> |

### FANCC - LOSS - Copy number 0

**Variant** LOSS-OF-FUNCTION, [534](#), Loss Of Function Variant

#### Description

This variant has 1 evidence item associated with it

| Level | ID   | Disease           | Type       | Direction | Significance         | PubMed ID                |
|-------|------|-------------------|------------|-----------|----------------------|--------------------------|
| D     | 1307 | Pancreatic Cancer | Predictive | Supports  | Sensitivity/Response | <a href="#">16243825</a> |

# Australian Translational Genomics Centre Queensland University of Technology

|                     |              |                      |              |
|---------------------|--------------|----------------------|--------------|
| <b>Patient Name</b> | XXXXXXXXXXXX | <b>UR Number</b>     | XXXXXXXXXXXX |
| <b>DOB</b>          | 14 Mar 2019  | <b>AusLab Number</b> | XXXXXXXXXXXX |
| <b>Sex</b>          | XXXXXXXXXXXX | <b>FIN</b>           | XXXXXXXXXXXX |

## CCND1 - GAIN - Copy number 5

**Variant** AMPLIFICATION, [18](#), Transcript Amplification

**Description** CCND1 amplification has been implicated in poorer prognosis in non-small cell lung cancer.

This variant has 3 evidence items associated with it

| Level             | ID   | Disease                       | Type       | Direction | Significance         | PubMed ID                |
|-------------------|------|-------------------------------|------------|-----------|----------------------|--------------------------|
| <a href="#">B</a> | 354  | Non-small Cell Lung Carcinoma | Prognostic | Supports  | Poor Outcome         | <a href="#">17070615</a> |
| <a href="#">B</a> | 1495 | Skin Melanoma                 | Predictive | Supports  | Sensitivity/Response | <a href="#">26307133</a> |
| <a href="#">D</a> | 1562 | Breast Cancer                 | Predictive | Supports  | Sensitivity/Response | <a href="#">19874578</a> |

## FGF3 - GAIN - Copy number 9

**Variant** AMPLIFICATION, [630](#), Transcript Amplification

**Description**

This variant has 1 evidence item associated with it

| Level             | ID   | Disease       | Type       | Direction | Significance         | PubMed ID                |
|-------------------|------|---------------|------------|-----------|----------------------|--------------------------|
| <a href="#">B</a> | 1606 | Breast Cancer | Predictive | Supports  | Sensitivity/Response | <a href="#">23658459</a> |

## RSF1 - GAIN - Copy number 5

**Variant** AMPLIFICATION, [358](#), Transcript Amplification

**Description**

This variant has 1 evidence item associated with it

| Level             | ID  | Disease       | Type       | Direction | Significance | PubMed ID                |
|-------------------|-----|---------------|------------|-----------|--------------|--------------------------|
| <a href="#">B</a> | 857 | Breast Cancer | Predictive | Supports  | Resistance   | <a href="#">24367492</a> |

## RSF1 - GAIN - Copy number 5

**Variant** AMPLIFICATION, [358](#), Transcript Amplification

**Description**

This variant has 1 evidence item associated with it

| Level             | ID  | Disease       | Type       | Direction | Significance | PubMed ID                |
|-------------------|-----|---------------|------------|-----------|--------------|--------------------------|
| <a href="#">B</a> | 857 | Breast Cancer | Predictive | Supports  | Resistance   | <a href="#">24367492</a> |

# Australian Translational Genomics Centre Queensland University of Technology

|                     |              |                      |              |
|---------------------|--------------|----------------------|--------------|
| <b>Patient Name</b> | XXXXXXXXXXXX | <b>UR Number</b>     | XXXXXXXXXXXX |
| <b>DOB</b>          | 14 Mar 2019  | <b>AusLab Number</b> | XXXXXXXXXXXX |
| <b>Sex</b>          | XXXXXXXXXXXX | <b>FIN</b>           | XXXXXXXXXXXX |

## NF2 - LOSS - Copy number 0

**Variant** LOSS, [697](#), Loss Of Function Variant

### Description

This variant has 1 evidence item associated with it

| Level | ID   | Disease           | Type       | Direction | Significance         | PubMed ID                |
|-------|------|-------------------|------------|-----------|----------------------|--------------------------|
| D     | 1742 | Thyroid Carcinoma | Predictive | Supports  | Sensitivity/Response | <a href="#">26359368</a> |

## SOX10 - LOSS - Copy number 0

**Variant** LOSS, [672](#), Loss Of Function Variant

### Description

This variant has 1 evidence item associated with it

| Level | ID   | Disease  | Type       | Direction | Significance | PubMed ID                |
|-------|------|----------|------------|-----------|--------------|--------------------------|
| D     | 1710 | Melanoma | Predictive | Supports  | Resistance   | <a href="#">24670642</a> |

## Additional Comments

The following genes had a proportion of bases with lower than normal coverage. The following lists the percentage of coding bases in tested genes with less than 60X coverage. While mutation may still be called in these regions, the sensitivity may be lower.

ASNS (53.68%), AURKA (40.43%), B2M (64.17%), BIRC3 (54.88%), BTK (70.08%), CALR (43.38%), CCNE1 (27.09%), CDK4 (16.23%), CEBPA (10.49%), CRBN (24.68%), ERBB3 (24.71%), ESR1 (16.73%), FANCC (15.11%), FOXL2 (17.95%), FOXP1 (11.04%), GNA11 (21.67%), GNAQ (40.74%), GNAS (12.15%), HSPH1 (16.62%), JAK2 (23.98%), KDR (15.16%), MAPK1 (48.48%), MDM2 (21.95%), MLH1 (30.82%), MRE11 (34.46%), MSH2 (29.88%), MYCN (30.92%), NF2 (36.57%), NT5C2 (56.47%), POLE (14.52%), POT1 (93.65%), PRDM1 (40.65%), PTCH1 (33.93%), PTPRB (55.66%), RAC1 (82.86%), RAF1 (62.30%), REL (28.82%), RHOA (23.72%), RICTOR (37.08%), RIT1 (15.33%), ROS1 (16.89%), SMARCA4 (31.02%), SMARCB1 (44.39%), SMO (15.86%), SOX10 (12.71%), TOP1 (26.94%), TYMS (17.73%)

## Methodology

DNA libraries were prepared from the received samples and target regions captured using the IDT exome capture kit plus IDT custom spike in. Massively parallel sequencing was performed using the Illumina NextSeq 500 platform to an average depth of 507X for this sample. Data were aligned to the GRCh37 Human Genome reference sequence using the ATGC Bioinformatics Pipeline version and annotated according to the ATGC Clinical Variant Database version.

The assay reports somatic single nucleotide variants (SNV) and small (<100bp) insertions and deletions (INDELs) with a variant allele frequency >3% and the frequency is greater than the percentage of contamination detected plus 1.5%. Copy number variants (CNVs) spanning partial or whole genes are reported when amplification exceeds 5 copies or more and deletions are reported when the tumour purity (proportion of the sample that contains the somatic variant) is estimated to be greater than 60%. Previous validation assays found that the sensitivity of >99.5% for SNVs, >95% for INDELs with VAF >5% and sensitivity to reportable CNVs is >75% for tumour purities >15%. For higher tumour purities where VAF >25%, the sensitivity rises to >99.5% for SNVs and >95% for INDELs. For reportable CNVs sensitivity is >85% when tumour purity is >75% and >60% when tumour purity is

# Australian Translational Genomics Centre Queensland University of Technology

|                     |             |                      |            |
|---------------------|-------------|----------------------|------------|
| <b>Patient Name</b> | XXXXXXXXXX  | <b>UR Number</b>     | XXXXXXXXXX |
| <b>DOB</b>          | 14 Mar 2019 | <b>AusLab Number</b> | XXXXXXXXXX |
| <b>Sex</b>          | XXXXXXXXXX  | <b>FIN</b>           | XXXXXXXXXX |

>60%. The total mutational burden is a count of SNVs and INDELS within the IDT custom spike in regions predicted to cause protein coding alterations divided by the total number of bases tested (in Mbp).

The following genes were selected for filtering based on documented association with this cancer/tissue type:

ABCC3, ABL1, ACVR1, AKT1, AKT2, AKT3, ALK, APC, AR, ARAF, ASNS, ASS1, ASXL1, ATM, ATR, AURKA, B2M, BAP1, BCOR, BIRC3, BIRC7, BRAF, BRCA1, BRCA2, BTK, CALR, CCND1, CCND3, CCNE1, CDH1, CDK12, CDK4, CDKN2A, CDKN2B, CEBPA, CRBN, CSF3R, CTNNA1, DDR2, DNMT3A, EGFR, ERBB2, ERBB3, ERBB4, ERFF1, ESR1, EZH2, FANCC, FBXW7, FGF3, FGFR1, FGFR2, FGFR3, FLT3, FOXL2, FOXP1, GNA11, GNAQ, GNAS, GSTP1, HRAS, HSPH1, IDH1, IDH2, JAK1, JAK2, KDR, KIT, KMT2C, KMT2D, KRAS, LRP1B, MAP2K1, MAPK1, MDM2, MEN1, MET, MLH1, MRE11, MSH2, MSH6, MTOR, MYCN, MYD88, NCOA3, NF2, NOTCH1, NPM1, NRAS, NT5C2, NTRK1, NTRK3, PBRM1, PDGFRA, PIK3CA, PIK3R1, PML, POLE, POT1, PRDM1, PTCH1, PTEN, PTPRB, PTPRD, RAC1, RAF1, RB1, REL, RET, RHOA, RICTOR, RIT1, ROS1, RSF1, RUNX1, SETBP1, SF3B1, SMAD4, SMARCA4, SMARCB1, SMO, SOX10, SRSF2, STAG2, STAT3, STK11, TERT, TET2, TOP1, TP53, TSC1, TSC2, TYMS, U2AF1, VHL, WT1

These genes appear in the ATGC Clinical Variant database and either the genes and/or the specific variants are associated with A, B, C, D or E level evidence.

**Level A** Validated association: Proven/consensus association in human medicine.

**Level B** Clinical evidence: Clinical trial or other primary patient data supports association.

**Level C** Case Study: Individual case reports from clinical journals

**Level D** Preclinical evidence

**Level E** Inferential evidence, indirect evidence

In some instances, all somatic protein coding variants within a specific gene are deemed reportable. In order to ascertain whether a variant affects protein coding the Variant Effect Predictor categorises the variants using RefSeq transcripts and results are reported using HGVS nomenclature (<https://varnomen.hgvs.org>).

Rare errors in annotation can arise due to the presence of genomic transcripts not described in RefSeq. Alternatively, multiple genomic variations may combine to produce undetected protein coding changes. This could generate false positive and false negative results. The assay is not designed to ascertain whether the identified variants alter expression in the tissue sample.

For **research use only** information about mutations outside of the genes listed above, please contact ATGC directly via the contact details at the bottom of this page.

|                             |                                 |                                 |                                          |
|-----------------------------|---------------------------------|---------------------------------|------------------------------------------|
| <b>Tumour ID:</b>           | 20170724-0003                   | <b>Workflow Version:</b>        | 3.2.0                                    |
| <b>Normal ID:</b>           | 20170724-0001                   | <b>Workflow Commit:</b>         | e42932266e4a8d4beb3df16c6877b07a7e311b5b |
| <b>Clinical DB Version:</b> | 2018-11-27.2                    | <b>Report Software Version:</b> | 1.4.0                                    |
| <b>VEP Version:</b>         | v91                             | <b>Report Software Commit:</b>  | 444d1a491c89898ac4e6dad28e908861e7e0828a |
| <b>Run ID:</b>              | 171005_NB501489_0080_AHL2Y5BGX2 | <b>Analysis ID:</b>             | f408369d-d93d-4c49-93a1-eb304d9bd62a     |

## Disclaimer

The methods used to produce this report have been validated by Australian Translational Genomics Centre (ATGC) at Queensland University of Technology. Nonetheless, there is a chance that false positive and false negative results may occur as Pathology Queensland and ATGC are not in control of the tissue collection. Tissue collection factors that may give rise to false positive or false negative results include tissue heterogeneity, insufficient tissue quality, or contamination. A list of methodology including the bioinformatics pipeline utilised to draft the report are noted above. Diseases are influenced by many factors, including epigenetic and environmental variables that may not be addressed by this report, and, as such, the report should not be interpreted

# Australian Translational Genomics Centre Queensland University of Technology

|                     |             |                      |            |
|---------------------|-------------|----------------------|------------|
| <b>Patient Name</b> | XXXXXXXXXX  | <b>UR Number</b>     | XXXXXXXXXX |
| <b>DOB</b>          | 14 Mar 2019 | <b>AusLab Number</b> | XXXXXXXXXX |
| <b>Sex</b>          | XXXXXXXXXX  | <b>FIN</b>           | XXXXXXXXXX |

in isolation. Any diagnosis, or prognosis, should consider all pertinent clinical information in addition to this report. The bioinformatics pipeline used to identify the variants reported has also been validated by ATGC. The analysis limitations are outlined in the methodology section of this report.

The clinical significance of many variants is not well understood and interpretation of variants may change over time. Interpretation of variants in this report is performed to the best knowledge of the laboratory based on the information available at the time of reporting. Re-analysis of variants in previously issued reports in light of new evidence is not routinely performed, but may be available upon request
